# Supplementary material for: Development of a Portable Detection Method for Enteric Viruses from Ambient Air and Its Application to a Wastewater Treatment Plant
Source: PubMed Central journal article supplement (PMC6789845; doi:10.3390/pathogens8030131), 2019-08-24
Supplement: pathogens-08-00131-s001.pdf [file pathogens-08-00131-s001.pdf]

**TableS1 Sequences of primers and probes for real-time PCR****Norovirus Genotypes I (Kageyama et al. 2003)**

| Name (Function*) | Sequence (5' → 3')             | Tm   | Final |
|------------------|--------------------------------|------|-------|
| COG1F(+)         | CGYTGGATGCGNTTYCATGA           | 61.1 | 400nM |
| COG1R(-)         | CTTAGACGCCATCATCATTYAC         | 56.3 | 400nM |
| RING1(a)-TP(P)   | FAM-AGATYGCGATCYCCTGTCCA-TAMRA | 61.7 | 300nM |

Thermal conditions: 95°C 15sec → 56°C 60sec [85bp]

**Norovirus Genotypes II (Kageyama et al. 2003)**

| Name (Function*) | Sequence (5' → 3')             | Tm   | Final |
|------------------|--------------------------------|------|-------|
| COG2F(+)         | CARGARBCNATGTTYAGRTGGATGAG     | 65.6 | 400nM |
| COG2R(-)         | TCGACGCCATCTTCATTCACA          | 61.1 | 400nM |
| RING2-TP(P)      | FAM-TGGGAGGGCGATCGCAATCT-TAMRA | 65.8 | 300nM |

Thermal conditions: 95°C 15sec → 56°C 60sec [98bp]

**Enterovirus (Katayama et al. 2002)**

| Name (Function*) | Sequence (5' → 3')                   | Tm   | Final |
|------------------|--------------------------------------|------|-------|
| Pan-Entero(+)    | CCTCCGGCCCCCTGAATG                   | 60.9 | 400nM |
| Pan-Entero(-)    | ACCGGATGGCCAATCCAA                   | 60.6 | 400nM |
| Pan-Entero(P)    | FAM-CCGACTACTTTGGGTGTCCGTGTTTC-TAMRA | 66.3 | 300nM |

Thermal conditions: 95°C 15sec → 60°C 60sec [197bp]

**Adenovirus for all serotypes (Heim et al. 2003)**

| Name (Function*) | Sequence (5' → 3')                      | Tm   | Final |
|------------------|-----------------------------------------|------|-------|
| AQ1(+)           | GCCCCAGTGGTCTTACATGCACATC               | 66.4 | 500nM |
| AQ2(-)           | GCCACGGTGGGGTTTCTAAACTT                 | 63.2 | 500nM |
| AP(P)            | FAM-TGCACCAGACCCGGGCTCAGGTACTCCGA-TAMRA | 78.1 | 400nM |

Thermal conditions: 95°C 3sec → 55°C 10sec → 65°C 60sec [132bp]

**Murine norovirus 1 (Kitajima M. unpublished)**

| Name (Function*) | Sequence (5'→3')           | Tm | Final |
|------------------|----------------------------|----|-------|
| MKMNVF(+)        | CGGTGAAGTGCTTCTGAGGTT      | 58 | 400nM |
| MKMNVR(-)        | GCAGCGTCAGTGCTGTCAA        | 58 | 400nM |
| MKMNVP(P)        | FAM-CGAACCTACATGCGTCAG-MGB | 68 | 300nM |

Thermal conditions: 95°C 15s→56°C 60s [60bp]

**F-specific RNA coliphage serogroup 3 (Ogorzaly et al. 2006)**

| Name (Function*) | Sequence (5'→3')       | Tm | Final |
|------------------|------------------------|----|-------|
| FG3(+)           | CCGCGTGGGGTAAATCC      | -  | 400nM |
| FG3(-)           | TTCTTACGATTGCGAGAAGGCT | -  | 400nM |
| FG3(P)           | FAM-AAGCGGGTGCAGTT-MGB | -  | 300nM |

Thermal conditions: 95°C 15s→60°C 60s [116bp]

\* +; Forward primer, -; Reverse primer, P; Probe

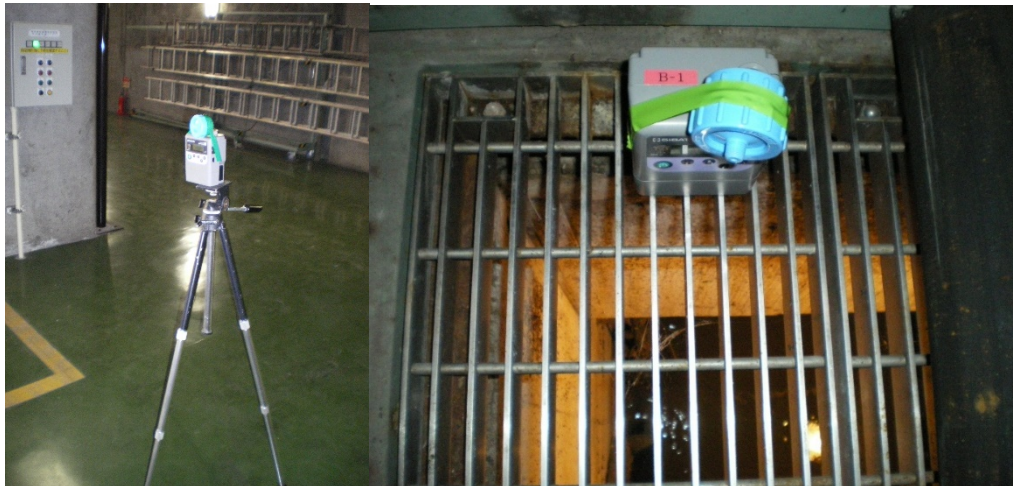

Figure S1 Photo of Sampling (at Wastewater Treatment Plant)

Table S2 Detection of Viruses from the Wastewater Treatment Plant (Detail)

| Sam pling Time | Sam pling Locaton | AdV<br>copies/m <sup>3</sup> air | NV G I<br>copies/m <sup>3</sup> air | NV G II<br>copies/m <sup>3</sup> air | FG 3<br>copies/m <sup>3</sup> air | EV<br>copies/m <sup>3</sup> air |
|----------------|-------------------|----------------------------------|-------------------------------------|--------------------------------------|-----------------------------------|---------------------------------|
| Nov-07         | A                 | +                                | +                                   | 3.2E+02                              | 1.8E+02                           | -                               |
|                | B                 | -                                | -                                   | 3.5E+01                              | -                                 | -                               |
|                | D                 | -                                | -                                   | -                                    | -                                 | +                               |
|                | E                 | -                                | -                                   | -                                    | -                                 | +                               |
|                | F                 | +                                | -                                   | 1.8E+02                              | 1.7E+02                           | -                               |
|                | G                 | NA                               | NA                                  | NA                                   | NA                                | NA                              |
|                | H                 | NA                               | NA                                  | NA                                   | NA                                | NA                              |
|                | Dec-07            | A                                | -                                   | +                                    | 1.8E+02                           | -                               |
| B              |                   | -                                | -                                   | 3.0E+02                              | -                                 | +                               |
| D              |                   | -                                | -                                   | -                                    | -                                 | -                               |
| E              |                   | -                                | -                                   | -                                    | -                                 | -                               |
| F              |                   | 9.6E+01                          | 4.0E+01                             | 3.1E+03                              | +                                 | -                               |
| G              |                   | -                                | 2.3E+01                             | 8.1E+02                              | -                                 | -                               |
| H              |                   | NA                               | NA                                  | NA                                   | NA                                | NA                              |
| Jan-08         |                   | A                                | 4.0E+02                             | -                                    | -                                 | -                               |
|                | B                 | -                                | -                                   | -                                    | -                                 | -                               |
|                | D                 | NA                               | NA                                  | NA                                   | NA                                | NA                              |
|                | E                 | NA                               | NA                                  | NA                                   | NA                                | NA                              |
|                | F                 | -                                | +                                   | 4.0E+02                              | -                                 | -                               |
|                | G                 | -                                | -                                   | -                                    | -                                 | -                               |
|                | H                 | -                                | +                                   | 6.3E+02                              | -                                 | -                               |

-: Not Detected, +: Detected, NA: Not Analyzed

NV G I: Norovirus Genogroup I NV G II: Norovirus Genogroup II AdV: Adenovirus (all serotypes), FG 3: F+ specific RNA Coliphage serotype 3
